# Supplementary material
Source: publisher site journal article supplement (https://www.dovepress.com/article/438892)

**Supplementary Figure 1: Things that Help Symptoms
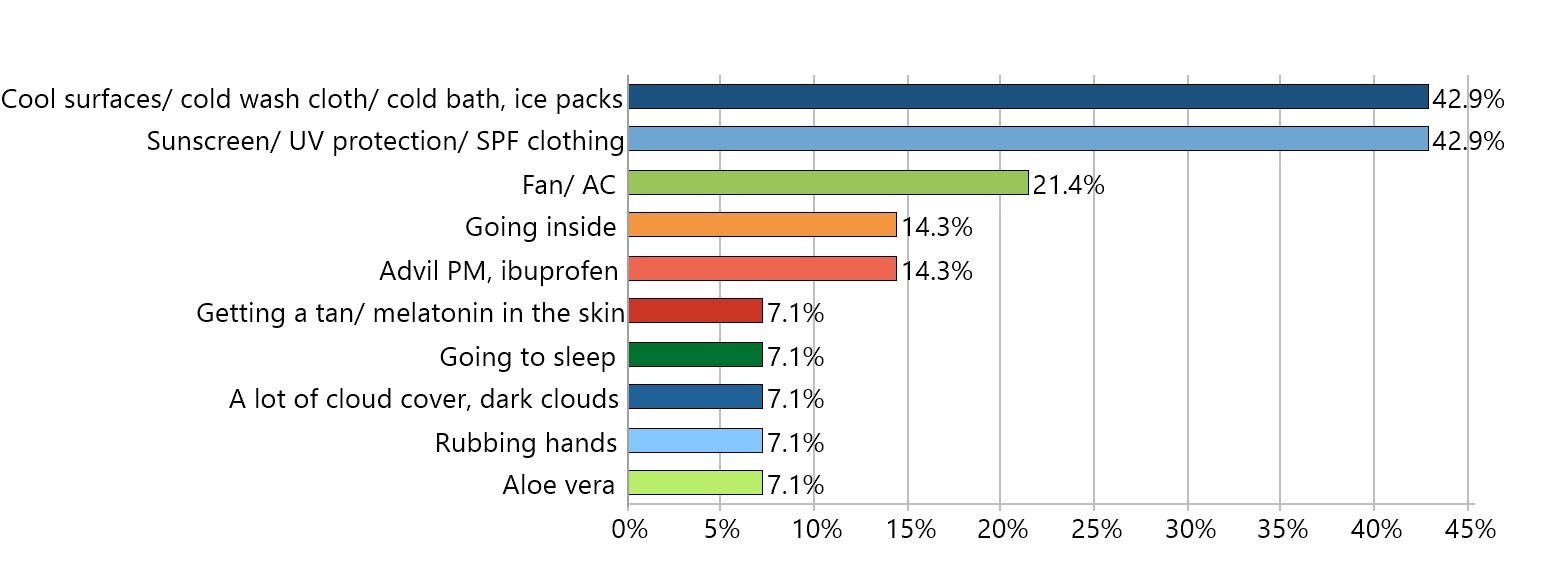
**

**Supplementary Figure 2: Emotional Impacts**


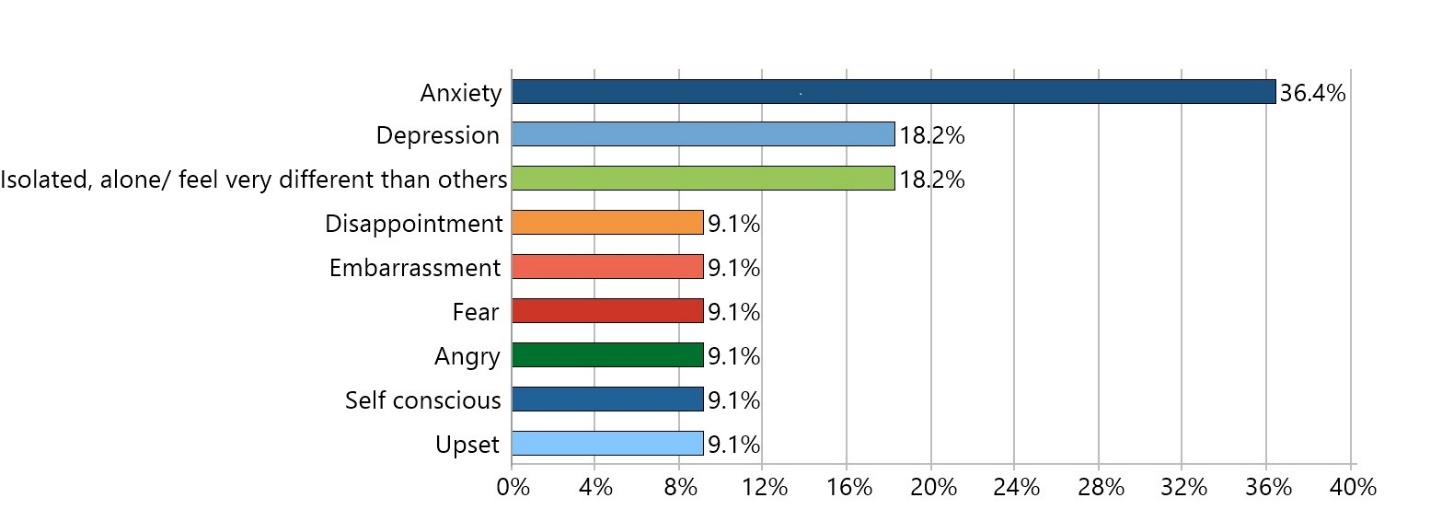

Supplement: Supplementary file 1 [file get_supplementary_file.php]
